# Supplementary material for: Hetero-epitaxial growth of vertically-aligned TiO2 nanorods on an m-cut sapphire substrate with an (001) SnO2 buffer layer
Source: Royal Society of Chemistry journal article supplement (doi:10.1039/c2ce25196e), 2012-01-01
Supplement: c2ce25196e.pdf [file c2ce25196e.pdf]

## Electronic Supplementary Information

---

# Hetero-epitaxial growth of vertically-aligned TiO<sub>2</sub> nanorods on m-cut sapphire substrate with (001) SnO<sub>2</sub> buffer layer

Won-Sik Kim, Yun-Guk Jang, Dai-Hong Kim, Hong-Chan Kim and Seong-Hyeon Hong\*

*Department of Materials Science and Engineering and Research Institute of Advanced  
Materials, Seoul National University, Seoul 151-744, Republic of Korea, Fax: +82-2-885 -  
1748; Tel: +82-2-880-6273; E-mail: shhong@snu.ac.kr*

### 1. Experimental Details

**Preparation of SnO<sub>2</sub> buffer layer.** M-cut (100) sapphire was used as a substrate. Before deposition, the substrate was ultrasonically cleaned in acetone, ethanol, and de-ionized water for 10 min. Highly (001) oriented epitaxial SnO<sub>2</sub> film was deposited by plasma enhanced atomic layer deposition (PE-ALD). The Sn precursor was dibutyl tin diacetate (DBTDA, ((CH<sub>3</sub>CO<sub>2</sub>)<sub>2</sub>Sn[(CH<sub>2</sub>)<sub>3</sub>-CH<sub>3</sub>]<sub>2</sub>). The time sequence for source pulse, first purge, plasma pulse, and second purge was 2, 8, 10, and 8 s, respectively. The deposition was conducted with an rf power of 100W at 240 mTorr for 500 cycles. The SnO<sub>2</sub> buffered m-cut sapphire substrate was annealed at 600 °C to enhance their crystallinity before the TiO<sub>2</sub> nanorod growth.

**Synthesis of TiO<sub>2</sub> nanorods.** For TiO<sub>2</sub> nanorod growth, 25 mL of de-ionized water was mixed with 25 mL of concentrated hydrochloric acid (36.5% ~ 38% by weight) and stirred at ambient conditions for 5 min. and then 0.8 mL of titanium butoxide (Ti(OBu)<sub>4</sub>, 97% Aldrich) was added to the solution and stirred until the solution became transparent. As-prepared solution was transferred to the Teflon-lined stainless steel autoclave with 120 mL capacity. A piece of SnO<sub>2</sub> buffered M-cut sapphire was placed against the wall of the Teflon-liner just below the solution surface. The hydrothermal synthesis was conducted at 150 °C for 0.5~3.0 h in an electric oven. After synthesis, the autoclave was naturally cooled to room temperature. The as-synthesised TiO<sub>2</sub> nanorods were taken out, rinsed with de-ionized water, and dried in ambient air.

**Materials Characterization.** The morphology of as-synthesized product was observed by field-emission scanning electron microscopy (FE-SEM, JSM-7401F, JEOL). The phase and in- and out of-plane orientation relationships between nanorods and substrate were examined by X-ray diffraction (XRD) and X-ray pole figure. The out-of plane orientation was examined by  $\theta$ -2 $\theta$  X-ray diffraction (Model D8-Advance, BRUKER MILLER Co.) using Cu K $\alpha$  radiation ( $\lambda=1.5406\text{\AA}$ ), and the in-plane orientation was investigated by X-ray pole figure (Model X'Pert Pro, PANalytical, the Netherlands), which was performed in Schulz reflection geometry by

scanning the tilt angle of goniometer,  $\chi$  (Chi), in the range of 0–85° and the azimuthal angle,  $\phi$  (phi), in the range of 0–360° with a step size of 5°. High-resolution transmission electron microscopy (HR-TEM, JEM-3000F, JEOL) analysis was further performed to investigate the crystal structure of nanorods and interfaces between nanorod, buffer layer, and substrate.

## 2. Results and Discussion

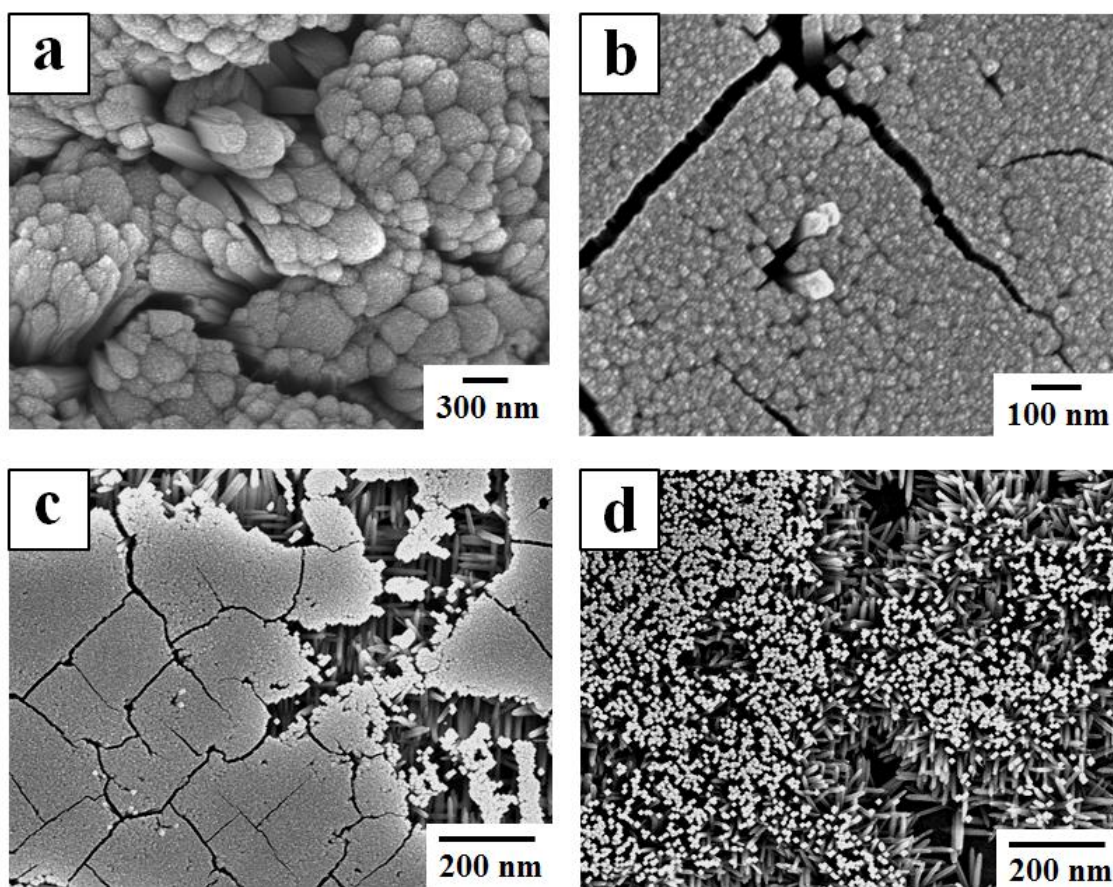

**Figure S1.** SEM images of TiO<sub>2</sub> rods grown on (a) bare m-cut sapphire and (b-d) SnO<sub>2</sub> buffered m-cut sapphire.

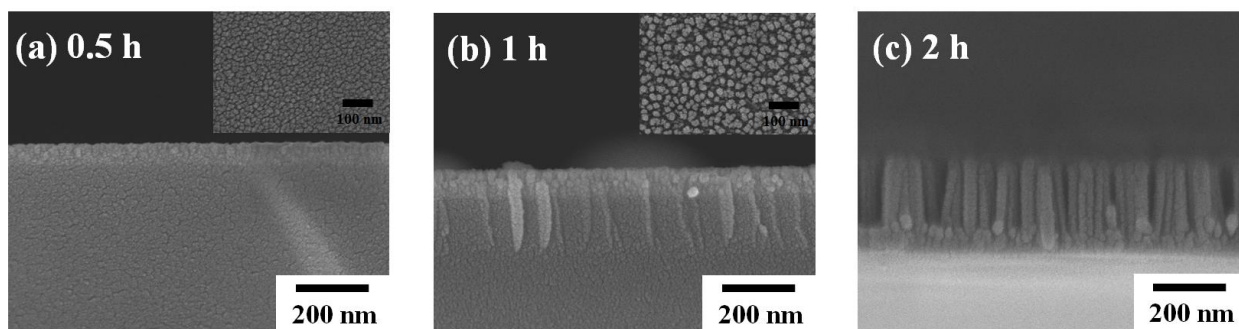

**Figure S2.** SEM images of TiO<sub>2</sub> rods grown for (a) 0.5 h, (b) 1.0 h, and (c) 2.0 h..

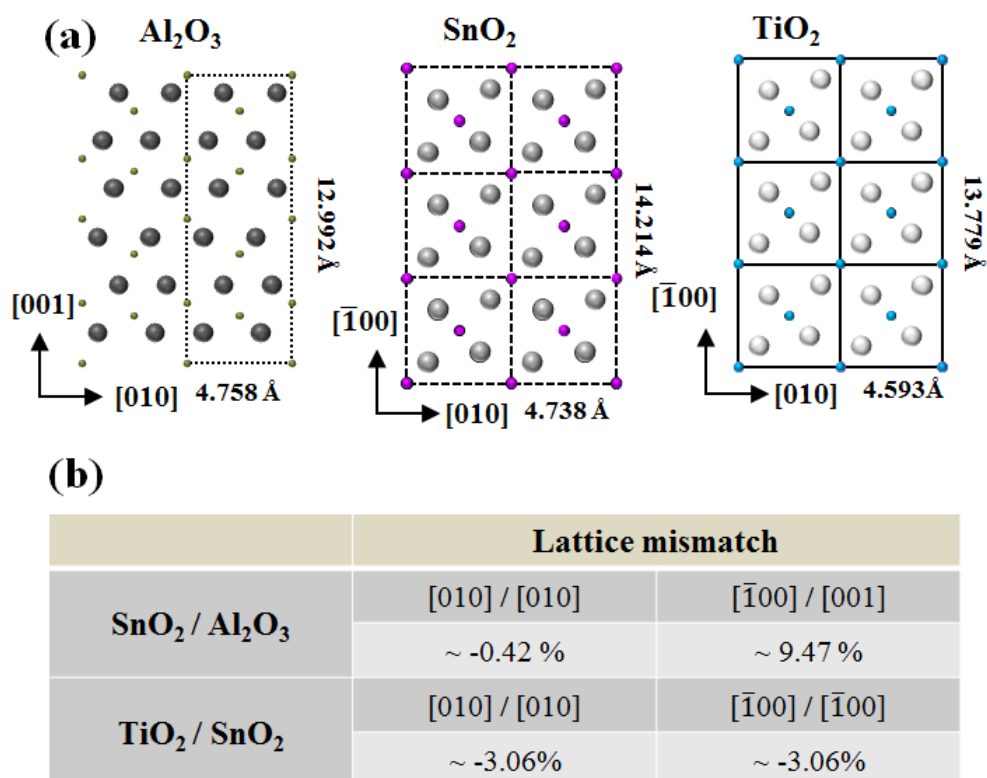

**Figure S3.** (a) Atomic configurations of m-cut sapphire,  $\text{SnO}_2$  buffer layer, and  $\text{TiO}_2$  nanorod based on the determined in-plane orientation relationships and (b) estimated lattice mismatches.

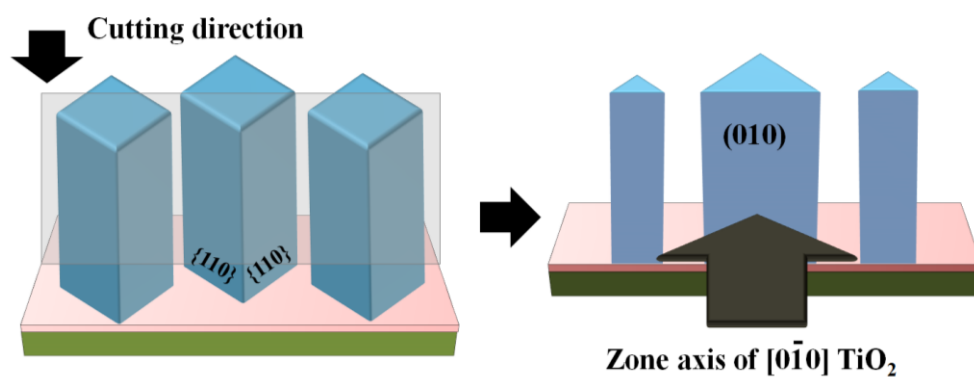

**Figure S4.** The preparation of cross-sectional TEM sample by FIB.

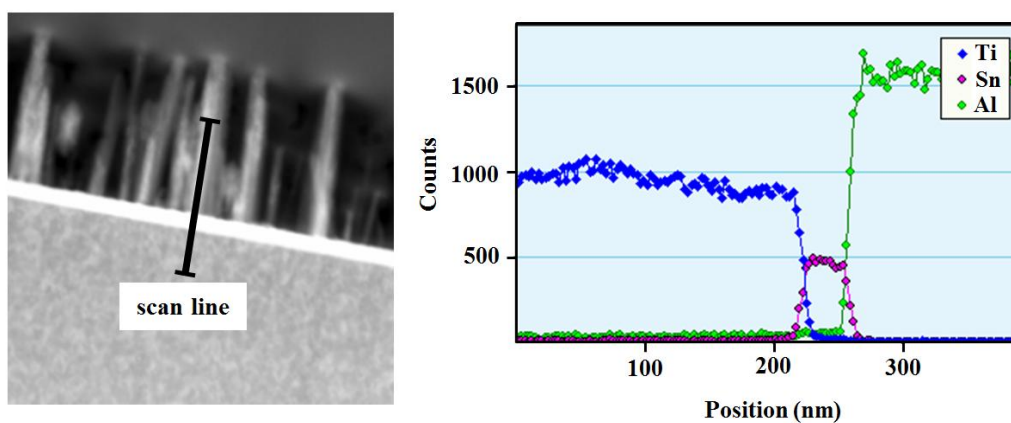

**Figure S5.** The energy dispersive X-ray spectroscopy (EDS) analysis of TiO<sub>2</sub> nanorods/SnO<sub>2</sub> buffer layer/m-cut sapphire substrate



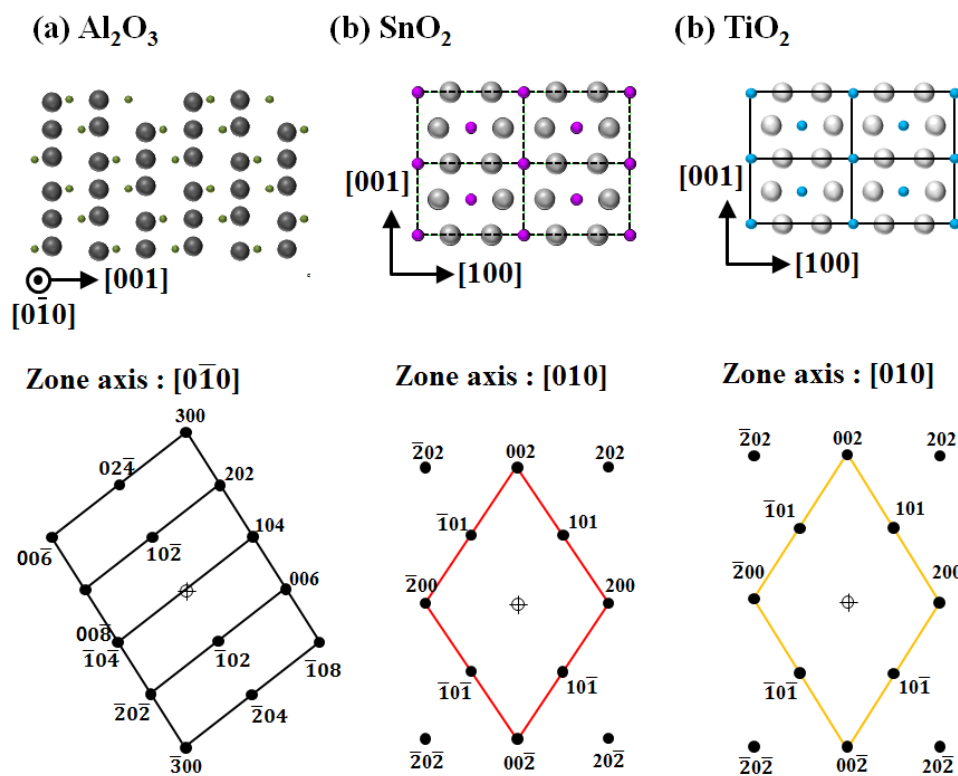

**Figure S6.** Atomic configurations and simulated diffraction patterns; (a) m-cut sapphire with a view direction of  $[\text{0}\bar{1}\text{0}]$ , (b)  $\text{SnO}_2$  buffer layer with a view direction of  $[\text{010}]$ , and (c)  $\text{TiO}_2$  nanorod with a view direction of  $[\text{010}]$ .

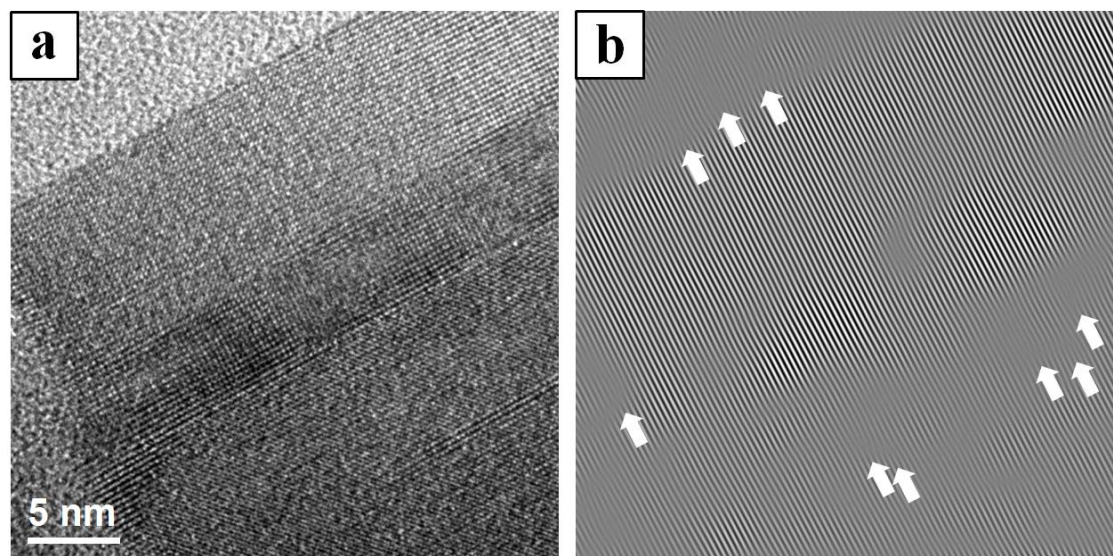

**Figure S7.** (a) HRTEM image of  $\text{TiO}_2$  nanorod and (b) filtered FFT image of (a) (arrows indicate the line defects in the  $\text{TiO}_2$  nanorods).

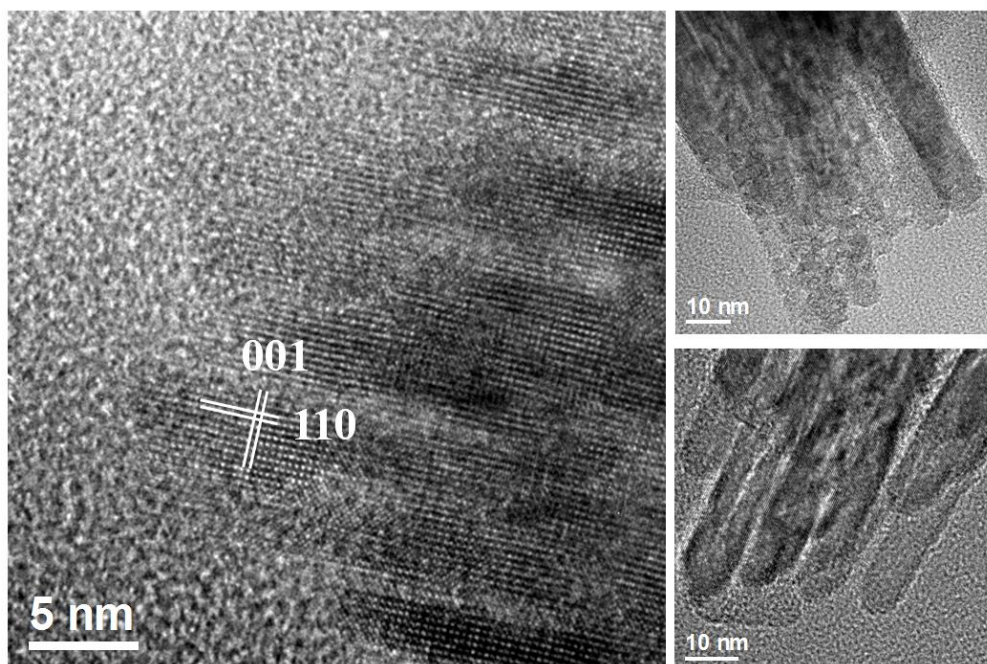

**Figure S8.** HRTEM images of TiO<sub>2</sub> nanorod tips.
